1 Title: In vitro effect of a non-immunosuppressive FKBP ligand, FK1706, on SARS-CoV-2  
2 replication in combination with antivirals

3 Running Title: FK1706-remdesivir in vitro synergy against SARS-CoV-2

4 William E. Fitzsimmons<sup>a,b</sup> #, Tracy L. Hartman<sup>c</sup>, Michelle Mendenhall<sup>d</sup>, Catherine Z. Chen<sup>e</sup>

5 a. University of Illinois at Chicago, Chicago, IL

6 b. Tutela Pharmaceuticals Inc, Vernon Hills, IL

7 c. ImQuest Biosciences, Frederick, MD;

8 d. Institute for Antiviral Research, Utah State University, Logan, UT;

9 e. National Center for Advancing Translational Sciences, NIH, Rockville, MD;

10

11 #Address correspondence to: William E. Fitzsimmons

12 [wfitzsim@uic.edu](mailto:wfitzsim@uic.edu)

13 \*Present Address: University of Illinois at Chicago, College of Pharmacy

14 833 S. Wood Street

15 Chicago, IL 60612

16

17

18

19

20

21

22

23

24

25

26

27

28

29

30

31

32

33 **Abstract**

34 FKBP, a naturally occurring ubiquitous intracellular protein, has been proposed as a potential  
35 target for coronavirus replication. A non-immunosuppressive FKBP ligand, FK1706, was studied  
36 in vitro in a Vero cell model to assess potential activity alone and in combination with antivirals  
37 against SARS-CoV-2 replication. When combined with remdesivir, synergistic activity was seen  
38 (summary synergy score  $24.7 \pm 9.56$ ). FK1706 warrants in vivo testing as a potential new  
39 combination therapeutic for the treatment of COVID-19 infections.

40

41

42

43

44

45

46

47

48

49

50

51

52

53

54

55

56 FKBP is one of the naturally occurring ubiquitous intracellular proteins called immunophilins that  
57 has enzymatic activity as a peptidyl prolyl cis-trans isomerase and is also essential to the  
58 pharmacologic activity of immunosuppressants. The binding of tacrolimus, everolimus, and  
59 sirolimus, to FKBP is necessary but not sufficient to produce immunosuppression (1,2).

60 Replication of human coronaviruses is dependent on active immunophilin binding and inhibition  
61 of cyclophilins, an intracellular immunophilin, by cyclosporine blocks the replication of CoVs of  
62 all genera tested, including SARS-CoV, human CoV-229E and -NL-63, feline CoV, as well as  
63 avian infectious bronchitis virus (3-6). More recently, the immunophilin FKBP has been  
64 described as one of the potential targets for SARS-CoV-2 (7,8).

65 Two ligands to FKBP that are not immunosuppressive, FK1706 (9,10) and ElteN378 (11,12)  
66 were studied. These compounds are structurally distinct; both bind to the core structure for  
67 FKBP but do not have intact calcineurin or mTOR binding domains that produce  
68 immunosuppression. Because these drugs target host cells and may work by a unique  
69 mechanism to inhibit coronavirus replication, the additive or synergistic effect with known virus-  
70 targeting antivirals with mechanisms of RNA polymerase inhibition (e.g., remdesivir), viral error  
71 catastrophe or viral lethal mutagenesis (e.g., molnupiravir), or protease inhibition (e.g.,  
72 M128533) were evaluated.

73 Vero E6 cells were infected with the live SARS-CoV-2 virus (USA-WA1/2020; World Reference  
74 Center for Emerging Viruses and Arboviruses (WRCEVA)) at low MOI (multiplicity of infection)  
75 and multiple rounds of viral replication occurred over the course of the assay. Percent CPE in  
76 compound-treated virus-infected cells were normalized to infected untreated cells as 0% and  
77 uninfected cells as 100% CPE protection. Based on these data, a concentration-response curve  
78 was created. Toxicity was assessed and compared in untreated, uninfected cells compared to  
79 treated cells.

80 In vitro testing was conducted at two independent laboratories in sequence. The details of the  
81 protocol followed by each laboratory are included in the appendix materials.

82 FK1706 (Shanghai SIMR Biotechnology Co. LQY20200910), ElteN378 (Glixx Laboratories Inc.  
83 GLXC -20448), remdesivir, molnupiravir, and M128533 were solubilized in DMSO and were  
84 diluted in culture test media to prepare compound concentrations.

85 Synergy was calculated using SynergyFinder 2.0 software (13). A summary synergy score  
86 greater than 10 was considered synergistic.

87 The initial results of FK1706 alone and in combination with remdesivir, molnupiravir, and  
88 M128533 are summarized in Table 1.

89 When combined, FK1706 (11-90  $\mu\text{M}$ ) and remdesivir (3  $\mu\text{M}$ ) were effective in inhibiting SARS  
90 CoV-2 viral CPE (93-100%, see Appendix Fig A1). FK1706 (2.85-90  $\mu\text{M}$ ) and molnupiravir (0.3  
91  $\mu\text{M}$ ) inhibited SARS CoV-2 CPE (up to 70% reduction in viral CPE at 90  $\mu\text{M}$  FK1706 with 0.3  
92  $\mu\text{M}$  molnupiravir; see Appendix Fig A2). FK1706 (11-90  $\mu\text{M}$ ) and M128533 (1  $\mu\text{g}/\text{mL}$ ) reduced  
93 SARS CoV-2 CPE (64-100%, see Appendix Fig A3).

94 Although FK1706 alone did not exhibit inhibitory activity against SARS-CoV-2, when combined  
95 with suboptimal concentrations (less than the  $\text{EC}_{50}$ ) of all three antivirals, increased inhibition  
96 was observed. Additive effects of ElteN378 with either remdesivir or M128533 were also  
97 demonstrated (see Appendix Table A1).

98 In follow-up confirmatory combination studies, FK1706 at multiple concentrations was tested in  
99 combination with multiple concentrations of remdesivir. When combined, remdesivir and  
100 FK1706 exhibited synergistic activity inhibiting SARS-CoV-2 and shifting the  $\text{EC}_{50}$  value of both  
101 compounds when in combination with the other (Figures 1A,B). The summary synergy scores  
102 were  $24.7 \pm 9.56$  by the ZIP (Supplementary Fig A4,A5),  $24.8 \pm 9.56$  by the Bliss and  $24.9 \pm 9.56$   
103 by the HSA models. Scores  $>10$  in all 3 models indicate synergy.

104 Molnupiravir alone, nor in combination with FK1706, did not demonstrate activity in the follow-up  
105 confirmatory study. There was no evidence of cytotoxicity with FK1706 or remdesivir alone or in  
106 combination (Appendix Figs A6,A7).

107 The synergistic effects of FK1706 in combination remdesivir were demonstrated in a live SARS-  
108 CoV-2 virus assay measuring the ability of compounds to inhibit viral-induced CPE in Vero E6  
109 host cells in vitro. The CPE reduction assay is a popular and widely used assay format to  
110 screen for antiviral agents because of its ease of use in quantitative high-throughput screening.  
111 The CPE reduction assay indirectly monitors the ability of compounds to inhibit viral replication  
112 and infection through various mechanisms, including direct inhibition of viral entry or enzymatic  
113 processes as well as acting on host pathways that modulate viral replication. This assay was  
114 previously used to screen 8,810 approved and investigational drugs from the National Center for  
115 Advancing Translational Sciences (NCATS) small molecule collections (14). A cytotoxicity  
116 counter-screen was conducted in parallel in host cells without addition of virus and  
117 demonstrated no substantial cytotoxicity of any of the test agents alone or in combination.

118 Since two chemically distinct FKBP ligands, FK1706 and ElteN378, both demonstrated activity,  
119 it is likely that FKBP is the key target. This target is in the host cells and complements the virus-  
120 targeted antivirals. The combination activity of these FKBP ligands was not limited to a single  
121 virus-targeted mechanism as the three antivirals have distinctly different mechanisms.  
122 Remdesivir (Veklury), currently the only FDA-approved antiviral for COVID-19 infections, is  
123 administered intravenously to patients (15). Molnupiravir has received Emergency Use  
124 Authorization as oral therapy for outpatient COVID-19 infections (16). Although both of these  
125 antivirals have demonstrated clinical efficacy, there is a need for higher response rates and  
126 FK1706 may have utility in both settings. Additionally, these combinations should be active  
127 against variants with mutations in spike protein.

128 Both live virus assays use Vero E6 as host cells. Vero E6 cells have been shown to have high  
129 drug efflux transporter P-glycoprotein (P-gp) activity, which can reduce cellular concentrations of  
130 test articles, and remdesivir is a known P-gp substrate (17). Therefore, synergy observed in  
131 Vero E6 cells could be due to P-gp inhibition, which enhances the exposure of remdesivir *in*  
132 *vitro*, and warrants repeating in other cell-based models.

133 FK1706 has completed all nonclinical safety pharmacology, ADME, and GLP toxicity studies to  
134 support clinical development. Phase 1 healthy volunteer and Phase 2 studies in patients with  
135 neuropathy have been completed (9). This clinical experience would expedite the introduction of  
136 FK1706 into clinical studies of patients infected with SARS-CoV-2.

137 In conclusion, these data demonstrate that FKBP is a valid target for coronavirus infections in  
138 combination with virus-targeted antivirals such as remdesivir and molnupiravir. FK1706 warrants  
139 testing in an *in vivo* animal model of SARS-CoV-2 and if promising, rapid introduction into  
140 COVID-19 infection clinical trials.

141

142

143

144

145

146

147

148 **Acknowledgements:**

149 The authors thank Diane M. Coniglio, Pharm.D., President, Opus Medical Communications for  
150 editorial assistance with the manuscript.

151

152 **Funding:**

153 This research was funded by Tutela Pharmaceuticals Inc., a 501(c)(3) not-for-profit  
154 pharmaceutical company. William E. Fitzsimmons is the Founder and Chair of Tutela  
155 Pharmaceuticals Inc. This work was supported by the Intramural Research Program of National  
156 Center for Advancing Translational Sciences, Sciences, National Institutes of Health.

157

158 **Figure Captions:**

159 Figure 1A. Concentration response of FK1706 when combined with remdesivir (RDM).

160 Figure 1B. Concentration response of remdesivir when combined with FK1706.

161

162

163

164

165

166

167

168

169

170

171

172

173

174

175 **References:**

- 176 1. Fitzsimmons WE. 2012. Tacrolimus. In: Kaplan B., Burckart G.J., Lakkis F.G., eds.  
177 Immunotherapy in Transplantation Principles and Practice. Wiley-Blackwell. Chichester, West  
178 Sussex, UK, pp. 224-240.
- 179
- 180 2. Tamura K, Fujimura T, Iwasaki K, Sakuma S, Fujitsu T, Nakamura K, Shimomura K, Kuno T,  
181 Tanaka C, Kobayashi M. 1994. Interaction of tacrolimus (FK506) and its metabolites with FKBP  
182 and calcineurin. *Biochem Biophys Res Commun.* 202:437-43.
- 183
- 184 3. Carbajo-Lozoya J, Müller MA, Kallies S, Thiel V, Drosten C, von Brunn A. 2012. Replication  
185 of human coronaviruses SARS-CoV HCoV-NL63 and HCoV-229E is inhibited by the drug  
186 FK506. *Virus Res.* 165: 112-117.
- 187
- 188 4. de Wilde AH, Falzarano D, Zevenhoven-Dobbe JC, Beugeling C, Fett C, Martellaro C,  
189 Posthuma CC, Feldmann H, Perlman S, Snijder EJ. 2017. Alisporivir inhibits MERS-and SARS-  
190 coronavirus replication in cell culture, but not SARS-coronavirus infection in a mouse model.  
191 *Virus Res.* 228: 7-13.
- 192
- 193 5. Pfefferle S, Schöpf J, Kögl M, Friedel CC, Müller MA, Carbajo-Lozoya J, Stellberger T, von  
194 Dall'Armi E, Herzog P, Kallies S, Niemeyer D, Ditt V, Kuri T, Züst R, Pumpor K, Hilgenfeld R,  
195 Schwarz F, Zimmer R, Steffen I, Weber F, Thiel V, Herrler G, Thiel HJ, Schwegmann-Wessels  
196 C, Pöhlmann S, Haas J, Drosten C, von Brunn A. 2011. The SARS-coronavirus-host  
197 interactome: identification of cyclophilins as target for pan-coronavirus inhibitors. *PLoS Pathog.*  
198 7(10):e1002331.
- 199
- 200 6. Tanaka Y., Sato Y., Sasaki T. 2013. Suppression of coronavirus replication by cyclophilin  
201 inhibitors. *Viruses.* 5:1250-60.
- 202
- 203 7. Gordon DE, Jang GM, Bouhaddou M, Xu J, Obernier K, White KM, O'Meara MJ, Rezelj VV,  
204 Guo JZ, Swaney DL, Tummino TA, Hüttenhain R, Kaake RM, Richards AL, Tutuncuoglu B,

205 Foussard H, Batra J, Haas K, Modak M, Kim M, Haas P, Polacco BJ, Braberg H, Fabius JM,  
206 Eckhardt M, Soucheray M, Bennett MJ, Cakir M, McGregor MJ, Li Q, Meyer B, Roesch F, Vallet  
207 T, Mac Kain A, Miorin L, Moreno E, Naing ZZC, Zhou Y, Peng S, Shi Y, Zhang Z, Shen W, Kirby  
208 IT, Melnyk JE, Chorba JS, Lou K, Dai SA, Barrio-Hernandez I, Memon D, Hernandez-Armenta  
209 C, Lyu J, Mathy CJP, Perica T, Pilla KB, Ganesan SJ, Saltzberg DJ, Rakesh R, Liu X,  
210 Rosenthal SB, Calviello L, Venkataramanan S, Liboy-Lugo J, Lin Y, Huang XP, Liu Y,  
211 Wankowicz SA, Bohn M, Safari M, Ugur FS, Koh C, Savar NS, Tran QD, Shengjuler D, Fletcher  
212 SJ, O'Neal MC, Cai Y, Chang JCJ, Broadhurst DJ, Klippsten S, Sharp PP, Wenzell NA,  
213 Kuzuoglu-Ozturk D, Wang HY, Trenker R, Young JM, Cavero DA, Hiatt J, Roth TL, Rathore U,  
214 Subramanian A, Noack J, Hubert M, Stroud RM, Frankel AD, Rosenberg OS, Verba KA, Agard  
215 DA, Ott M, Emerman M, Jura N, von Zastrow M, Verdin E, Ashworth A, Schwartz O, d'Enfert C,  
216 Mukherjee S, Jacobson M, Malik HS, Fujimori DG, Ideker T, Craik CS, Floor SN, Fraser JS,  
217 Gross JD, Sali A, Roth BL, Ruggero D, Taunton J, Kortemme T, Beltrao P, Vignuzzi M, García-  
218 Sastre A, Shokat KM, Shoichet BK, Krogan NJ. 2020. A SARS-CoV-2 protein interaction map  
219 reveals targets for drug repurposing. *Nature*. 583(7816):459-468.

220

221 8. Shigdel UK, Lee SJ, Sowa ME, Bowman BR, Robison K, Zhou M, Pua KH, Stiles DT,  
222 Blodgett JAV, Udworthy DW, Rajczewski AT, Mann AS, Mostafavi S, Hardy T, Arya S, Weng Z,  
223 Stewart M, Kenyon K, Morgenstern JP, Pan E, Gray DC, Pollock RM, Fry AM, Klausner RD,  
224 Townson SA, Verdine GL. 2020. Genomic discovery of an evolutionarily programmed modality  
225 for small-molecule targeting of an intractable protein surface. *Proc Natl Acad Sci USA*.  
226 117:17195-17203.

227

228 9. Minematsu T, Lee J, Zha J, Moy S, Kowalski D, Hori K, Ishibashi K, Usui T, Kamimura  
229 H. 2010. Time-dependent inhibitory effects of  
230 (1R,9S,12S,13R,14S,17R,18E,21S,23S,24R,25S,27R)-1,14-dihydroxy-12-(E)-2-[(1R,3R,4R)-4-  
231 hydroxy-3-methoxycyclohexyl]-1-methylvinyl-23,25-dimethoxy-13,19,21,27-tetramethyl-17-(2-  
232 oxopropyl)-11,28-dioxa-4-azatricyclo[22.3.1.0(4.9)]octacos-18-ene-2,3,10,16-tetrone (FK1706),  
233 a novel nonimmunosuppressive immunophilin ligand, on CYP3A4/5 activity in humans in vivo  
234 and in vitro. *Drug Metab Dispos*. 38:249-59.

235



- 236 10. Price RD, Yamaji T, Yamamoto H, Higashi Y, Hanaoka K, Yamazaki S, Ishiye M, Aramori I,  
237 Matsuoka N, Mutoh S, Yanagihara T, Gold BG. 2005. FK1706, a novel non-immunosuppressive  
238 immunophilin: neurotrophic activity and mechanism of action. *Eur J Pharmacol.* 509:11-9.  
239
- 240 11. Caminati G, Martina MR, Menichetti S, Procacci P. 2019. Blocking the FKBP12 induced  
241 dendrimeric burst in aberrant aggregation of a-synuclein by using the ElteN378 synthetic  
242 inhibitor. *J Enz Inhib Med Chem.* 34: 1711-1715.  
243
- 244 12. Martina MR, Tenori E, Bizzarri M, Menichetti S, Caminati G, Procacci P. 2013. The precise  
245 chemical-physical nature of the pharmacore in FK506 binding protein inhibition: ElteX, a New  
246 class of nanomolar FKBP12 ligands. *J Med Chem.* 56:1041-51.  
247
- 248 13. Ianevski A., Giri A.K., Aittokallio T. 2020. SynergyFinder 2.0: visual analytics of multi-drug  
249 combination synergies. *Nucleic Acids Research.* 48:W488–W493.  
250
- 251 14. Chen CZ, Shinn P, Itkin Z, Eastman RT, Bostwick R, Rasmussen L, Huang R, Shen M, Hu  
252 X, Wilson KM, Brooks BM, Guo H, Zhao T, Klump-Thomas C, Simeonov A, Michael SG, Lo DC,  
253 Hall MD, Zheng W. 2021. Drug repurposing screen for compounds inhibiting the cytopathic  
254 effect of SARS-CoV-2. *Front Pharmacol.* 11:592737.  
255
- 256 15. Rubin D, Chan-Tack K, Farley J, Sherwat A. 2020. FDA approval of remdesivir- a step in  
257 the right direction. *N. Engl. J. Med.* 383:2598-2600.  
258
- 259 16. Jayk Bernal A, Gomes da Silva MM, Musungaie DB, Kovalchuk E, Gonzalez A, Delos  
260 Reyes V, Martín-Quirós A, Caraco Y, Williams-Diaz A, Brown ML, Du J, Pedley A, Assaid C,  
261 Strizki J, Grobler JA, Shamsuddin HH, Tipping R, Wan H, Paschke A, Butterton JR, Johnson  
262 MG, De Anda C; MOVE-OUT Study Group. 2021. Molnupiravir for oral treatment of Covid-19 in  
263 nonhospitalized patients. *N Engl J Med.* 2021 Dec 16:NEJMoa2116044.  
264

265 17. Kumar D., Trivedi, N. 2021. Disease-drug and drug-drug interaction in COVID-19: Risk and  
266 assessment. *Biomed Pharmacother.* 2021.139: 111642.

267

268

269

270

271

272

273

274

275

### Remdesivir dose response (CPE)

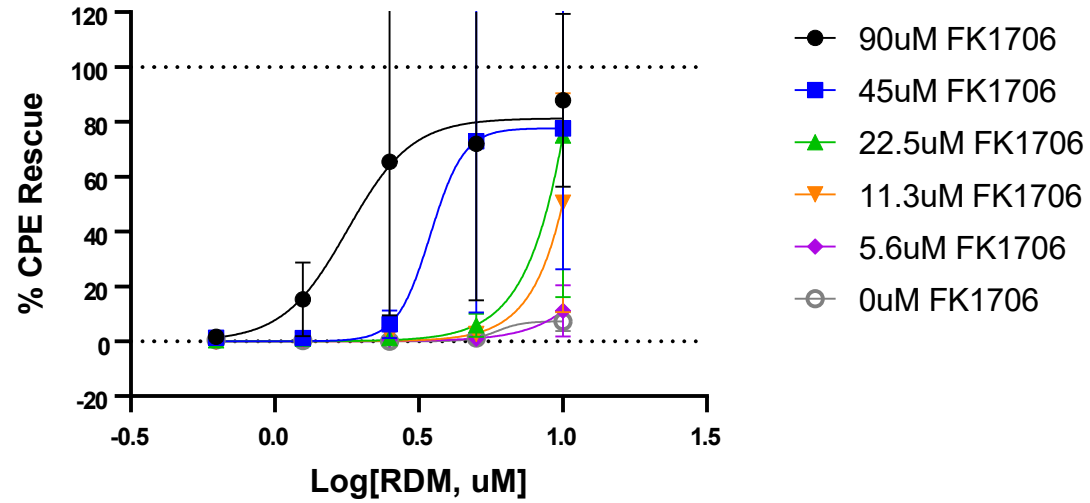

|      | 90uM FK1706 | 45uM FK1706 | 22.5uM FK1706 | 11.3uM FK1706 |
|------|-------------|-------------|---------------|---------------|
| EC50 | 1.789       | 3.468       | 18.55         | 20.76         |

# FK1706 dose response (CPE)

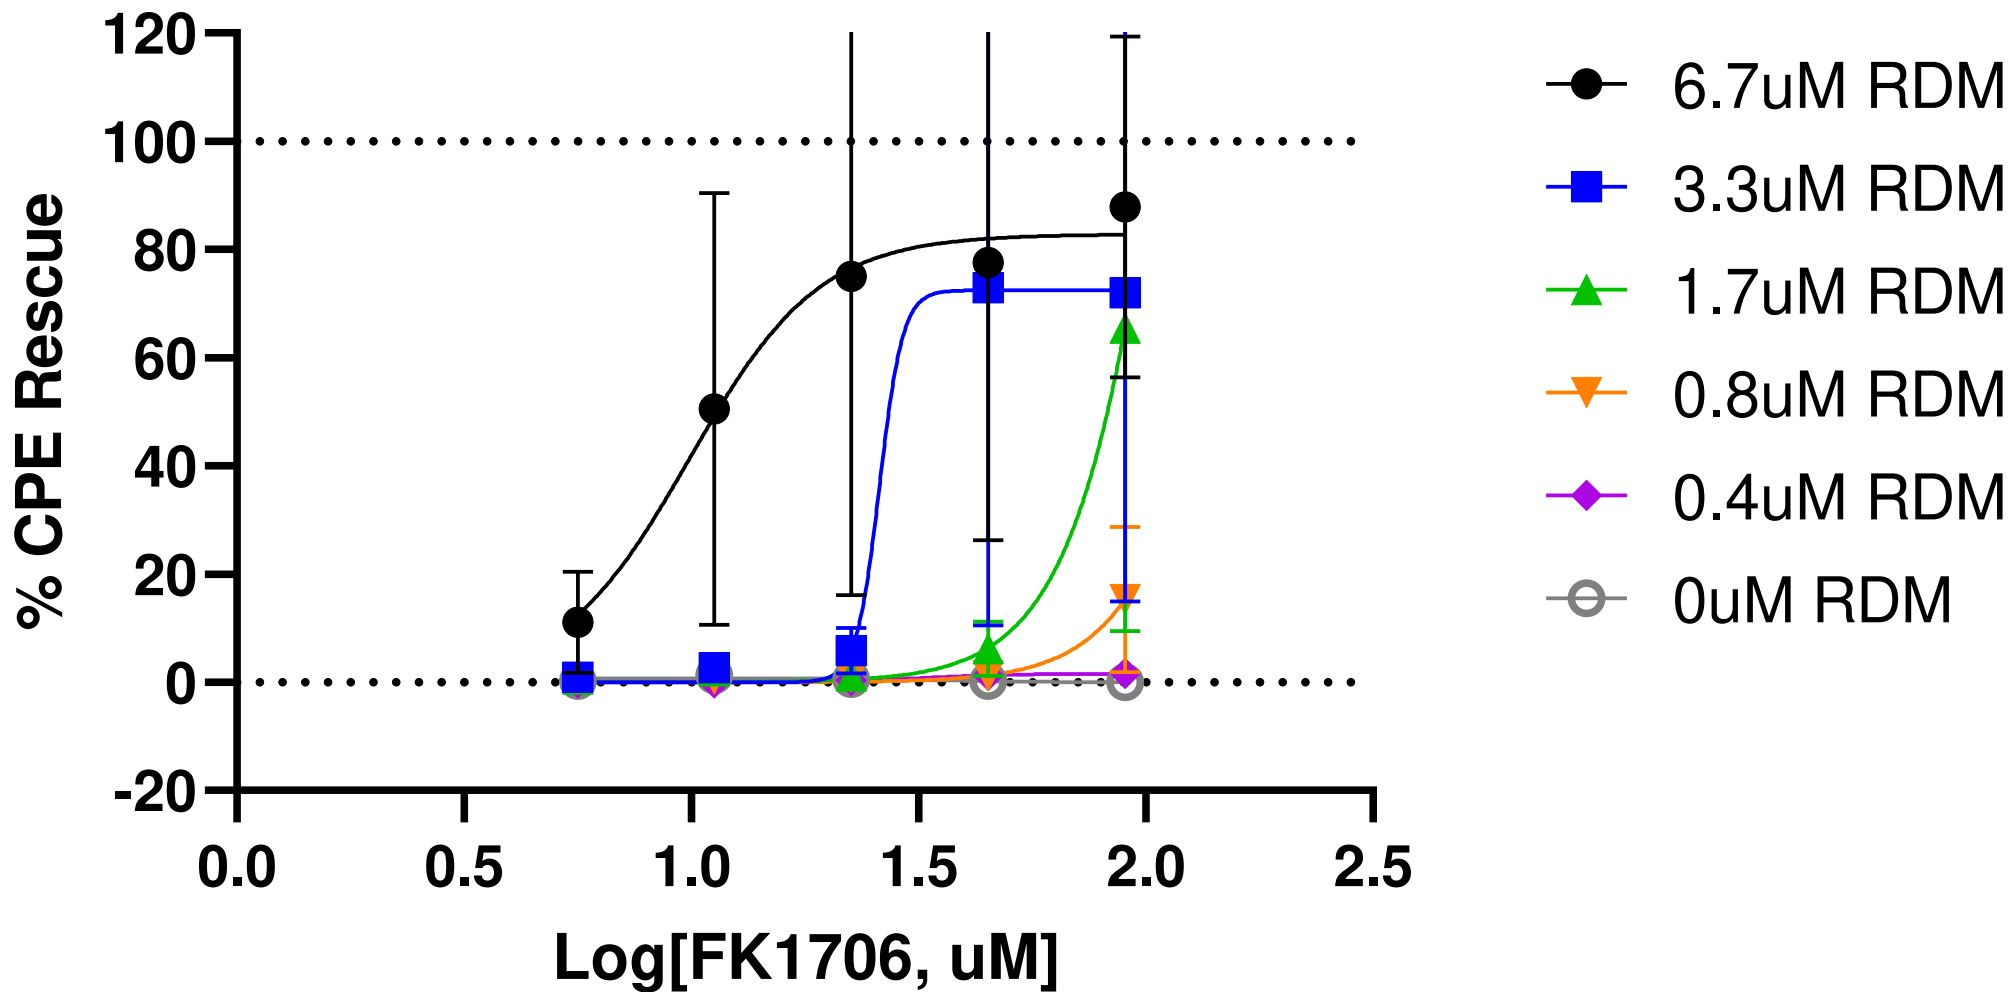

|      | 6.7uM RDM | 3.3uM RDM | 1.7uM RDM |
|------|-----------|-----------|-----------|
| EC50 | 9.926     | 25.96     | 137.9     |

**Table 1. Anti-SARS-CoV-2 Cytoprotection Assay Results for FK1706 and antivirals against SARS-CoV-2 (USA-WA1/2020).**

| Compound or combination        | EC <sub>50</sub> (μM) | TC <sub>50</sub> (μM) | TI    |
|--------------------------------|-----------------------|-----------------------|-------|
| FK1706                         | >90                   | >90                   | --    |
| FK1706 + Remdesivir (3 μM)     | <11.3                 | >90                   | >7.96 |
| Remdesivir (3 μM)              | >3                    | >3                    | --    |
| Remdesivir                     | 3.63                  | >100                  | >27.5 |
| FK1706 + M128533 (1 μg/mL)     | <11.3                 | >90                   | >7.96 |
| M128533 (1 μM)                 | >1                    | >1                    | --    |
| M128533 (μg/mL)                | 1.53                  | 86.8                  | 56.7  |
| FK1706 + Molnupiravir (0.3 μM) | 28.7                  | >90                   | >3.14 |
| Molnupiravir (single conc.)    | >0.3                  | >0.3                  | --    |
